# Supplementary material
Source: PubMed Central journal article supplement (PMC2816611)

Supplementary Table 1. Oligonucleotide primers used in this study.

| oBB #                                                                | Primer Name         | Nucleotide Seq. (5'-3')    | Length | Tm    | GC%   | Product Size (bp) |
|----------------------------------------------------------------------|---------------------|----------------------------|--------|-------|-------|-------------------|
| <i>cspI</i> genotyping primers (followed by HindIII digestion)       |                     |                            |        |       |       |                   |
| 196                                                                  | Prdm16_i6-7_F4      | GGGATCACCTAACCAAGTGATGATT  | 24     | 60.47 | 41.67 | 494               |
| 197                                                                  | Prdm16_i6-7_R4      | TCTAATCCACCACACCTCATCTC    | 23     | 60.38 | 47.83 | 494               |
| <i>cspI</i> recombinant interval - genotyping microsatellite markers |                     |                            |        |       |       |                   |
| 96                                                                   | chr4TG_375328F      | CCAGCTTGGGTGAATCTGTT       | 20     | 60.11 | 50    | 168               |
| 97                                                                   | chr4TG_375328R      | CGGCCTCAGAGATCAGAAAC       | 20     | 59.95 | 55    | 168               |
| 120                                                                  | chr4complex_920386F | GACCTGAAGGCTGCCATAAC       | 20     | 59.7  | 55    | 180               |
| 121                                                                  | chr4complex_920386R | AGGACTCAAGCAAAGTGGACA      | 21     | 59.9  | 47.62 | 180               |
| Novel microsatellite markers for <i>cspI</i> fine-mapping            |                     |                            |        |       |       |                   |
| 1                                                                    | chr4(CA)n_2097975_F | AGGCCTCCTAGAAGGACAGC       | 20     | 59.98 | 60    | 204               |
| 2                                                                    | chr4(CA)n_2097975_R | AGCCCAGATACTGCAAGCTC       | 20     | 59.6  | 55    | 204               |
| 5                                                                    | chr4(CA)n_1052954_F | CTGCTAAAACCTTACAAAGGTGGACT | 25     | 59.36 | 40    | 400               |
| 6                                                                    | chr4(CA)n_1052954_R | GCTACCTCCTTTTCCTTTTGTGA    | 22     | 59.76 | 45.45 | 400               |
| 130                                                                  | chr4CA_1275257F     | GACCATGCCACTGCACTTC        | 19     | 60.27 | 57.89 | 190               |
| 131                                                                  | chr4CA_1275257R     | GGGAAGAGAAGGTGTGTCCA       | 20     | 60.09 | 55    | 190               |
| MIT microsatellite markers for <i>cspI</i> fine-mapping              |                     |                            |        |       |       |                   |
|                                                                      | D4Mit13             |                            |        |       |       |                   |
|                                                                      | D4Mit42             |                            |        |       |       |                   |
|                                                                      | D4Mit254            |                            |        |       |       |                   |
|                                                                      | D4Mit344            |                            |        |       |       |                   |
|                                                                      | D4Mit256            |                            |        |       |       |                   |
| Prdm16 in situ probe primers                                         |                     |                            |        |       |       |                   |
| 164                                                                  | Prdm16x4-8F         | CTGGCTCAAGTACATCCGTGT      | 21     | 60.19 | 52.38 | 649               |
| 165                                                                  | Prdm16x4-8R         | CGTGCTGTGGATATGCTTGT       | 20     | 59.75 | 50    | 649               |
| 381                                                                  | Prdm16-3'UTR-F      | CACCTCAACACCTCCACTT        | 20     | 59.99 | 55    | 504               |
| 382                                                                  | Prdm16-3'UTR-R      | AGGTGTGGGTTTGCCAATAA       | 20     | 60.23 | 45    | 504               |

| PRDM16 cDNA primers for antibody generation |                 |                              |    |       |       |     |
|---------------------------------------------|-----------------|------------------------------|----|-------|-------|-----|
| 214                                         | Prdm16-Nterm-F  | GAATTCAGGCGAGGGCGAGGAAG      | 23 | 63.98 | 70.59 | 175 |
| 215                                         | Prdm16-Nterm-R  | AAGCTTGGAGTGAAGTCCTCGCTGGTG  | 27 | 64.56 | 61.9  | 175 |
| 216                                         | Prdm16-mid-F    | GAATTCATTACACGCCTGGCAGCATC   | 26 | 63.42 | 55    | 685 |
| 217                                         | Prdm16-mid-R    | AAGCTTGGTGGCGGGAAGAAGGAAT    | 25 | 63.54 | 57.89 | 685 |
| Prdm16 FL and S cDNA amplification Primers  |                 |                              |    |       |       |     |
| 972                                         | Prdm16FL-5'F    | CACCATGCGATCCAAGGCGAGGGCGA   | 26 | ND    | 65.3  | NA  |
| 538                                         | Prdm16FL-3'R    | GAGGTGGTTGATGGGGTTAAAGGCT    | 25 | 68.12 | 52.0  | NA  |
| 1053                                        | Prdm16S-x4ATG_F | CACCATGTGTCAGATCAACGAACAGAT  | 27 | 55.89 | 44.4  | NA  |
| 1034                                        | Prdm16cpo1-3'R  | CCGTGCTGTGGATATGCTTGTGCTGTTG | 29 | 74.69 | 51.72 | NA  |

## LEGENDS TO SUPPLEMENTARY FIGURES

**Supplemental Figure 1. *csp1* mutant palate shelves can fuse in the absence of the mandible and tongue.** wild-type (A) and *csp1* homozygous mutants (B) show palate shelf elevation, apposition and fusion in the absence of the mandible and tongue after approximately three days of *in vitro* suspension palate culture. Histologic examination of Hematoxylin and Eosin-stained coronal sections through the cultured palate shelves show that complete fusion of the bilateral palate shelves at the midline in wild-type (C) and *csp1* mutant (D) embryos showing complete fusion upon gross examination. Detailed compilation of suspension palate culture results is provided in the accompanying table.

**Supplemental Figure 2. *Prdm16* expression during embryonic limb formation.** *Prdm16* expression appears at about E10.5 and is robust in the mesenchyme of the forelimb and hindlimb buds by E11.5 (A). *Prdm16* expression becomes gradually more restricted to the condensing cartilage of the future digits at E12.5 (B) and gradually becomes refined to the regions surrounding the sites of future joint formation in the digits of the forelimb (C and D), hindlimbs (E) and knee (black arrowhead in F) from E13.5-E15.5.

**Supplemental Figure 3. The *Prdm16*<sup>Gt683Lex</sup> mutation causes recessive CP, and reporter expression in craniofacial structures is consistent with this phenotype.** (A-P) Histological analysis of coronal sections through the posterior (A, E, V, M), medial (B, F, J, N) and anterior (C, G, K, O) aspects of the secondary palate in heterozygous control and homozygous *Prdm16*<sup>Gt683Lex</sup> E13.5 and E14.5 embryos. Reporter expression is dose-sensitive. (A-H) At E13.5,

before palate shelf elevation and fusion, *Prdm16* reporter expression is strongest in the mesenchyme at the oral side of the palate shelves, although it is visible throughout the palate shelf and hinge region. Expression within the tongue musculature, molar tooth mesenchyme, and within Meckel's cartilage and surrounding perichondrium is also detected. Low-level expression in palate epithelia is difficult to visualize. **(I-P)** This expression pattern is maintained at E14.5, after palate shelf elevation and fusion. **(A-D, V-L)** The most intense palatal *Prdm16* expression is evident on the oral side of the palate shelves, while a posterior-anterior gradient of increased expression is evident in the palate shelves through to the highest expression in the primary palate and upper incisor regions **(D, H, L, P)**. V (Trigeminal ganglion), ps (palate shelf), T (tongue), MC (Meckel's cartilage), m (molar), i (incisor), pp (primary palate).

**Supplemental Figure 4. Loss of *Prdm16* expression perturbs *in vivo* TGF $\beta$  signaling in the mandible.** Immunofluorescent detection of TGF $\beta$ 2, TGF $\beta$ 3, Phospho-SMAD2, Phospho-SMAD1, 5, 8 and SMAD7 protein expression in wild-type (*wt*) **(A-F, J-M)** versus *Prdm16*<sup>Gt683Lex</sup> gene trap null mutant (*gt*) **(G-I, N, O)** E13.5 embryos. Expression of each protein in wild-type embryos is evident in secondary palate shelves, tongue, Meckel's cartilage, molar teeth and the undifferentiated mesenchyme between the oral sulci at the sides of the tongue and the perichondrium surrounding Meckel's cartilage which contains the salivary ducts **(A-F, J-M)**. A dramatic reduction in protein expression levels for each protein is observed in *Prdm16*<sup>Gt683Lex</sup> mutants in and around Meckel's cartilage and the region near the base of the tongue, consistent with the mandibular and salivary gland hypoplasia and gross tongue abnormalities observed in these mutants.

SUPPLEMENTARY FIGURES

Fig. S1

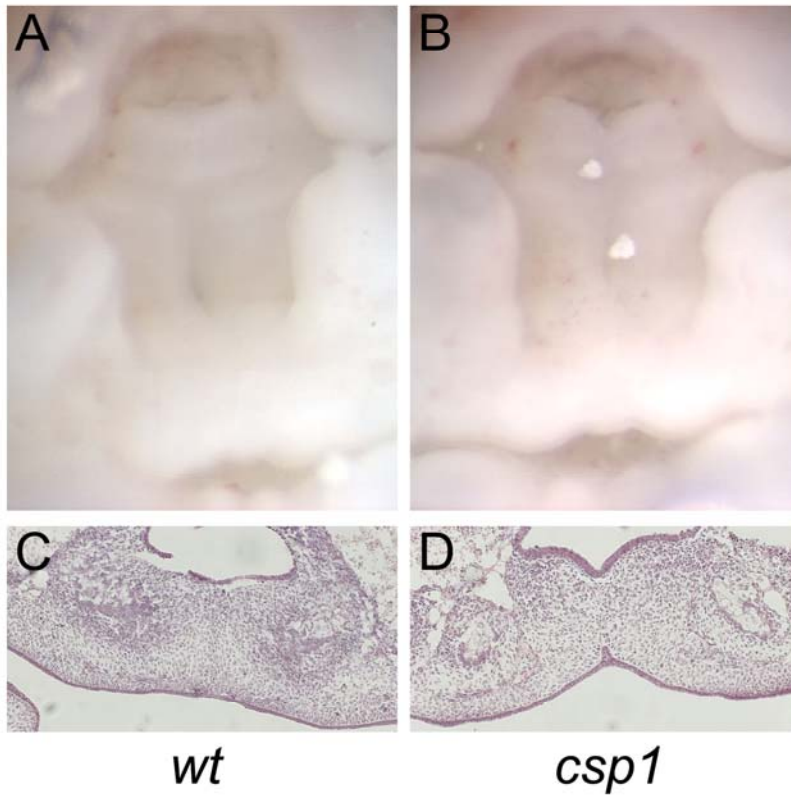

|                       | Shelves Apposed | Shelves Fused | Partial CP | Complete CP |
|-----------------------|-----------------|---------------|------------|-------------|
| <i>wt</i><br>(n=25)   | 23              | 18            | 2          | 0           |
| <i>csp1</i><br>(n=10) | 8               | 8             | 1          | 1           |

Fig. S2

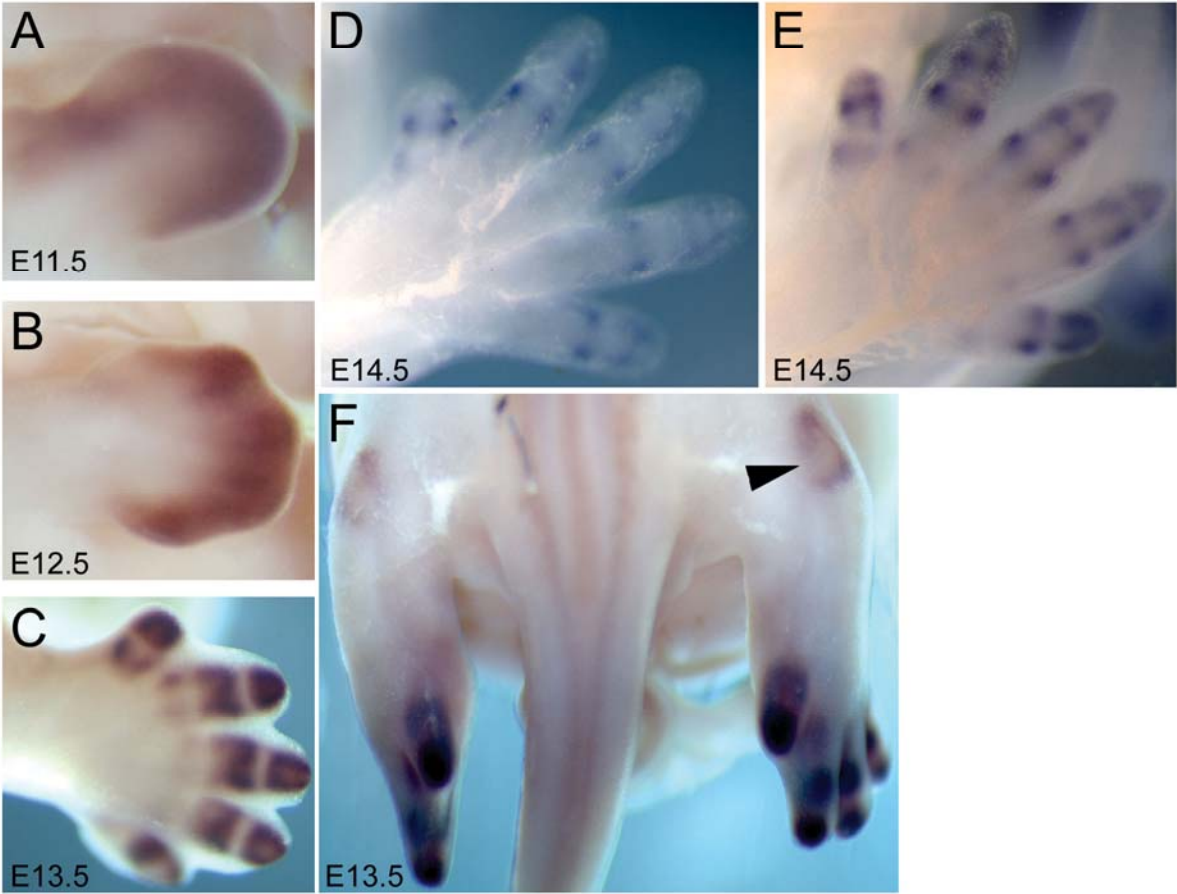

Fig. S3

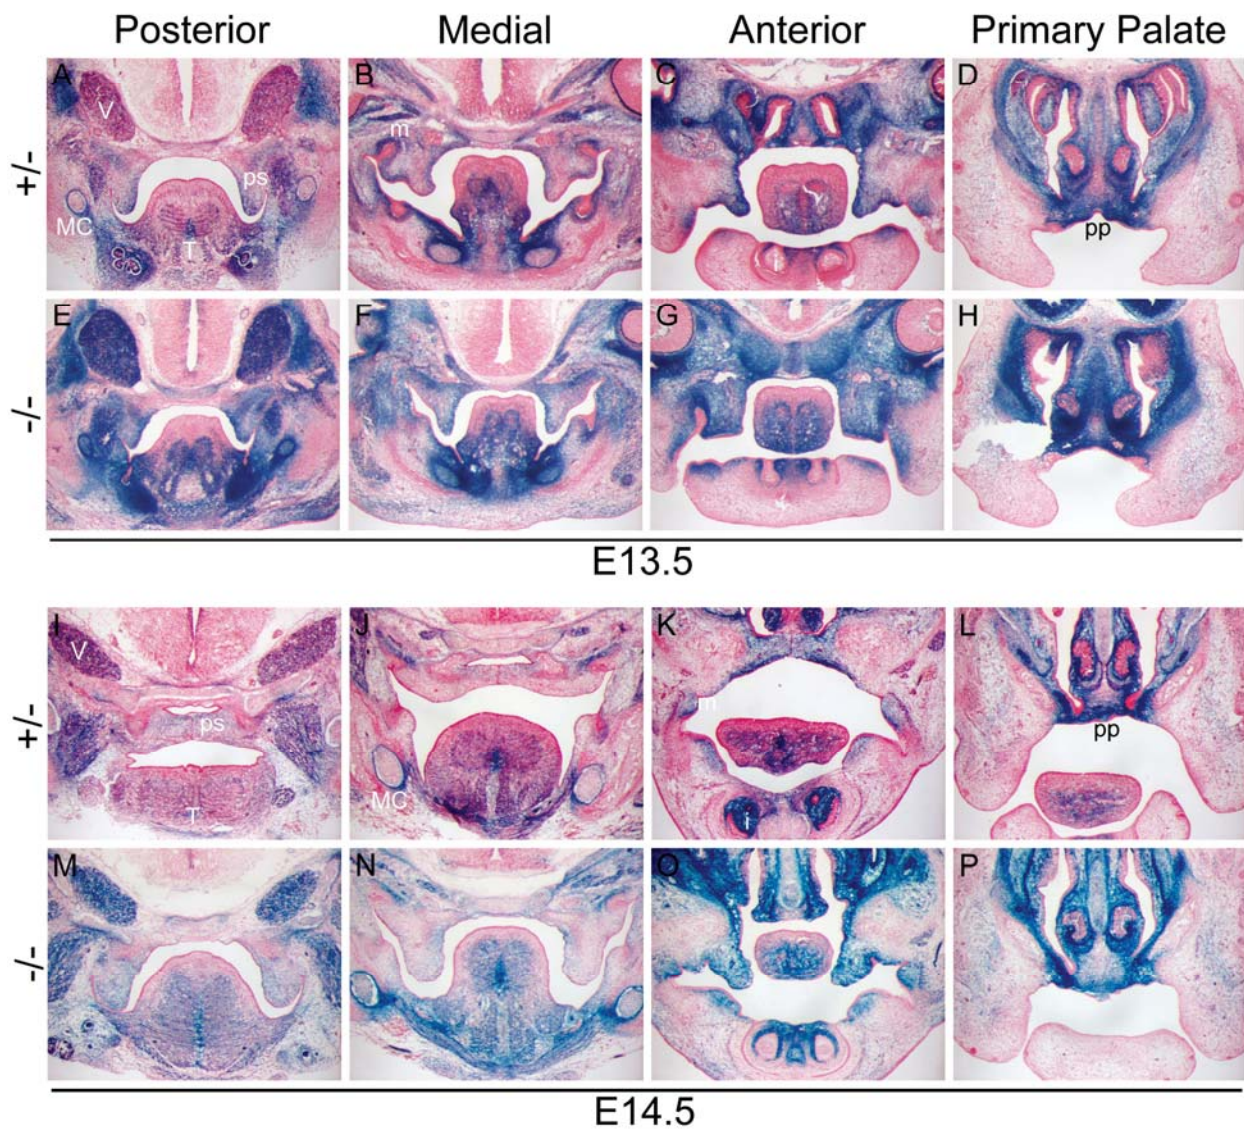

Fig. S4

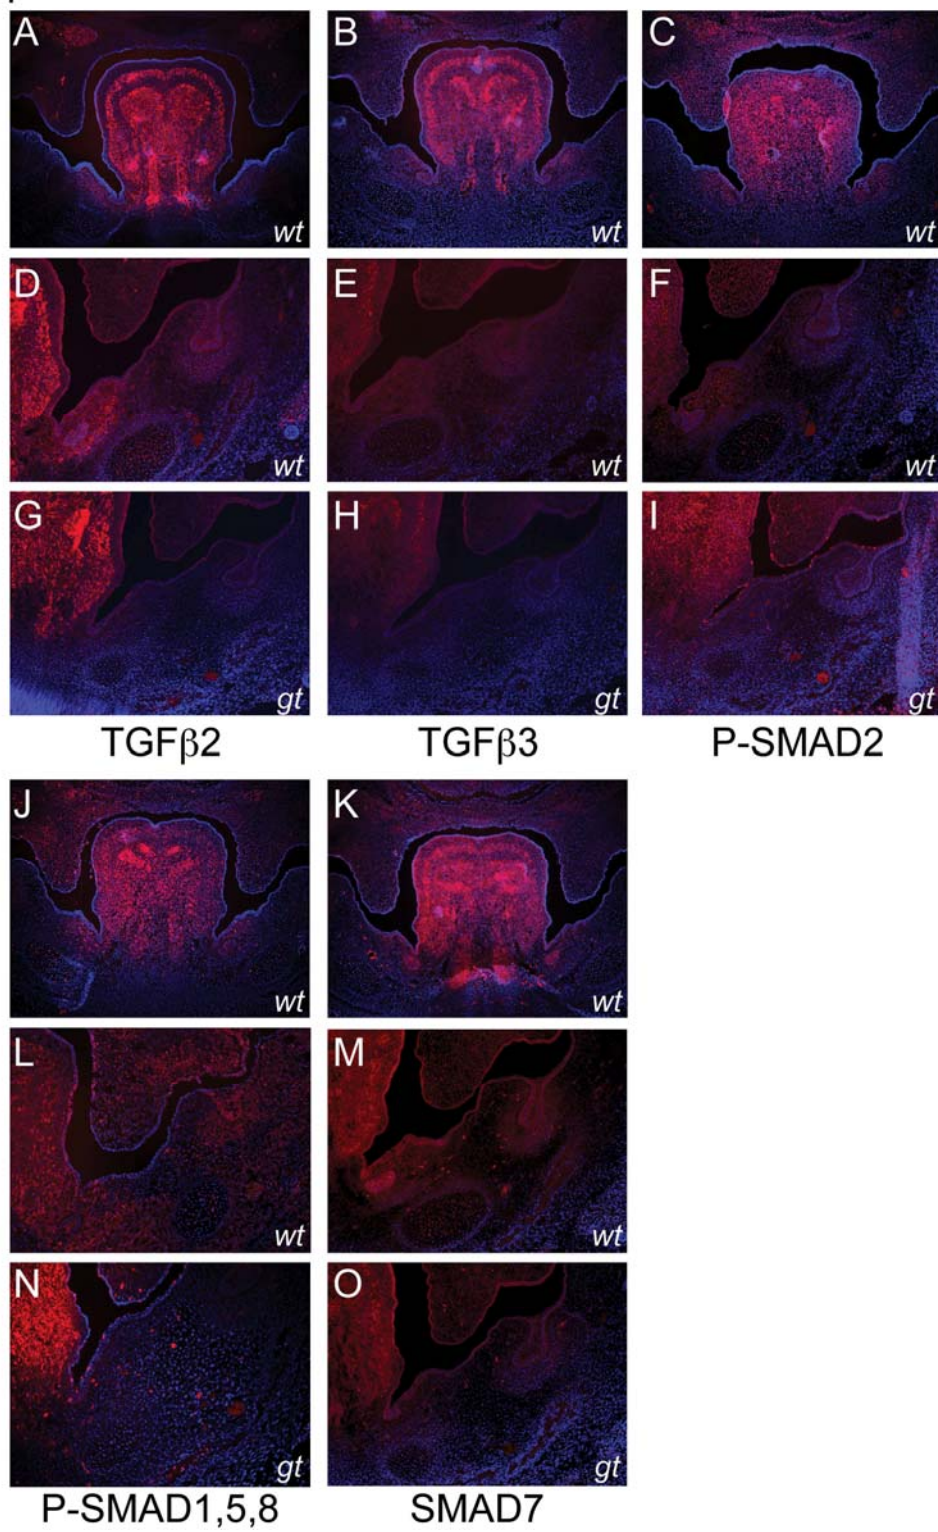

Supplement: ddp543_1.pdf [file ddp543_1.pdf]
